# Supplementary material for: Confirmation of high-throughput screening data and novel mechanistic insights into VDR-xenobiotic interactions by orthogonal assays
Source: Springer Nature journal article supplement (doi:10.1038/s41598-018-27055-3), 2018-06-05
Supplement: 41598_2018_27055_MOESM1_ESM.pdf [file 41598_2018_27055_MOESM1_ESM.pdf]

**Supplementary Data for: Confirmation of High-Throughput screening data and novel mechanistic insights into VDR-xenobiotic interactions by orthogonal assays**

Debabrata Mahapatra<sup>1</sup>, Jill A. Franzosa<sup>5</sup>, Kyle Roell<sup>2</sup>, Melaine Agnes Kuenemann<sup>2</sup>, Keith A. Houck<sup>5</sup>, David M. Reif<sup>2</sup>, Denis Fourches<sup>2</sup>, Seth W. Kullman<sup>3,4</sup>

<sup>1</sup> Comparative Biomedical Sciences, College of Veterinary Medicine, North Carolina State University, Raleigh, North Carolina, United States of America; <sup>2</sup> Bioinformatics Research Center, North Carolina State University, Raleigh, North Carolina, United States of America; <sup>3</sup> Department of Biological Sciences, North Carolina State University, Raleigh, North Carolina, United States of America, <sup>4</sup> Program in Environmental and Molecular Toxicology, North Carolina State University, Raleigh, North Carolina, United States of America, <sup>5</sup>National Center for Computational Toxicology, Office of Research and Development, U.S. Environmental Protection Agency, RTP, NC.

**Supplementary Table S1.** Summary of Mammalian 2-hybrid (M2H) data across all compounds. Compounds exhibiting statistically significant recruitment or inhibition of coregulators (RXR)/coactivators (SRC-1) have values expressed as percentages. Note that in addition to most agonists, antagonists do facilitate recruitment (FR) or inhibit recruitment (IR) in the presence or absence of co-transfected coregulators/coactivators. For corepressor (NCoR) recruitment data was expressed as fold induction compared to DMSO. NS indicate non-significant induction/inhibition values for coregulator/coactivator/corepressor recruitment.

| Agonists<br>Co Regulator<br>addition                   | pMSRC-1 + pVP16 hVDR |       |         |       | pMRXR + pVP16 hVDR |       |         |       | pMNCOR + pVP16 hVDR |       |         |       |
|--------------------------------------------------------|----------------------|-------|---------|-------|--------------------|-------|---------|-------|---------------------|-------|---------|-------|
|                                                        | +RXR                 |       | -RXR    |       | +SRC-1             |       | -SRC-1  |       | +RXR                |       | -RXR    |       |
|                                                        | Outcome              | Value | Outcome | Value | Outcome            | Value | Outcome | Value | Outcome             | Value | Outcome | Value |
| Vitamin D <sub>3</sub>                                 | FR                   | 100   | FR      | 100   | FR                 | 100   | FR      | 100   |                     | DMSO  |         | DMSO  |
| Calcipotriol                                           | FR                   | 135.9 | FR      | 142.9 | FR                 | 133.2 | FR      | 135.4 |                     | NS    |         | NS    |
| Lithocholic acid                                       | FR                   | 102.6 | FR      | 30.1  | FR                 | 63.5  | FR      | 29    |                     | NS    |         | NS    |
| 7-(Dimethylamino)-<br>4-methylcoumarin                 |                      | NS    |         | NS    |                    | NS    |         | NS    |                     | NS    |         | NS    |
| Disodium 4,4'-bis(2-<br>sulfostyryl) biphenyl          |                      | NS    |         | NS    |                    | NS    |         | NS    |                     | NS    |         | NS    |
| 4-Aminofolic acid                                      |                      | NS    |         | NS    |                    | NS    |         | NS    |                     | NS    |         | NS    |
| Ergocalciferol                                         | FR                   | 79.2  | FR      | 97.7  | FR                 | 68.6  | FR      | 56.8  |                     | NS    |         | NS    |
| Alpha-Terthiophene                                     |                      | NS    |         | NS    |                    | NS    | FR      | 3.5   |                     | NS    |         | NS    |
| Triamterene                                            | FR                   | 63.7  | FR      | 0.9   | FR                 | 3.7   | FR      | 8.4   |                     | NS    |         | NS    |
| Novaluron                                              |                      | NS    | FR      | 0.9   |                    | NS    |         | NS    |                     | NS    |         | NS    |
| 2,2'-methylenebis(6-<br>tert-butyl-4-<br>ethylphenol)  | FR                   | 8.9   | FR      | 7.2   |                    | NS    | FR      | 3.1   |                     | NS    |         | NS    |
| 9 Aminoacridine<br>monohydrochloride                   | FR                   | 9.5   | FR      | 14.4  | FR                 | 19.9  | FR      | 12.3  | FR                  | 53.1  | FR      | 67.7  |
| 2,2'-methylenebis(6-<br>tert-butyl-4-<br>methylphenol) | FR                   | 22.2  | FR      | 8.2   | FR                 | 100.7 | FR      | 79.6  |                     | NS    |         | NS    |
| 4,4'-butylidenebis(6-<br>tert-butyl-m-cresol           | FR                   | 0.91  | FR      | 3.6   |                    | NS    | FR      | 96.8  |                     | NS    |         | NS    |
| Tamoxifen citrate                                      | FR                   | 4.6   | FR      | 6.1   | FR                 | 19.4  | FR      | 46.6  |                     | NS    |         | NS    |
| Methyl 3-amino-5,6-<br>dichloropyrazine-2-             | FR                   | 0.26  |         | NS    | FR                 | 4.2   | FR      | 4.4   |                     | NS    |         | NS    |

|                                 |                               |              |                |              |                           |              |                |              |                            |              |                |              |
|---------------------------------|-------------------------------|--------------|----------------|--------------|---------------------------|--------------|----------------|--------------|----------------------------|--------------|----------------|--------------|
| carboxylate                     |                               |              |                |              |                           |              |                |              |                            |              |                |              |
| 2,7 Naphthalene disulfonic acid |                               | NS           |                | NS           |                           | NS           |                | NS           |                            | NS           |                | NS           |
| Cridanimod                      |                               | NS           |                | NS           |                           | NS           |                | NS           |                            | NS           |                | NS           |
| 7 methyl benzo (a) pyrene       |                               | NS           |                | NS           | FR                        | 1.5          |                | NS           |                            | NS           |                | NS           |
| Benzenesulfonic acid            |                               | NS           |                | NS           |                           | NS           |                | NS           |                            | NS           |                | NS           |
| Falnidamol dihydrochloride      |                               | NS           |                | NS           | FR                        | 3.7          | FR             | 5.3          |                            | NS           |                | NS           |
| Lanoconazole                    |                               | NS           |                | NS           | FR                        | 4.3          |                | NS           |                            | NS           |                | NS           |
|                                 |                               |              |                |              |                           |              |                |              |                            |              |                |              |
| <b>Antagonists</b>              | <b>pMSRC-1NR + pVP16 hVDR</b> |              |                |              | <b>pMRXR + pVP16 hVDR</b> |              |                |              | <b>pMNCOR + pVP16 hVDR</b> |              |                |              |
| <b>Co Regulator addition</b>    | <b>+ RXR</b>                  |              | <b>- RXR</b>   |              | <b>+SRC-1</b>             |              | <b>-SRC-1</b>  |              | <b>+ RXR</b>               |              | <b>- RXR</b>   |              |
|                                 | <b>Outcome</b>                | <b>Value</b> | <b>Outcome</b> | <b>Value</b> | <b>Outcome</b>            | <b>Value</b> | <b>Outcome</b> | <b>Value</b> | <b>Outcome</b>             | <b>Value</b> | <b>Outcome</b> | <b>Value</b> |
| Vitamin D <sub>3</sub>          | FR                            | 100          | FR             | 100          | FR                        | 100          | FR             | 100          |                            | DMSO         |                | DMSO         |
| Fluorescein sodium              |                               | NS           |                | NS           |                           | NS           |                | NS           | FR                         | 1.1          | FR             | 1.2          |
| Cadmium chloride                | FR                            | 241.9        | FR             | 258          | FR                        | 292          | FR             | 175          | FR                         | 0.5          | FR             | 1.1          |
| Tributyltin chloride            | IR                            | 24.9         |                | NS           | IR                        | 16.7         | IR             | 0.5          | FR                         | 1.8          | FR             | 2.2          |
| Thiram                          |                               | NS           |                | NS           |                           | NS           |                | NS           | FR                         | 1            | FR             | 1.7          |
| Aristolochic acid               | IR                            | 47.5         | FR             | 347.5        | FR                        | 146.9        | FR             | 402.5        | FR                         | 11.4         | FR             | 25.8         |
| Proflavine hydrochloride        |                               | NS           |                | NS           |                           | NS           |                | NS           | FR                         | 0.8          | FR             | 1.3          |
| Tazobactam sodium               |                               | NS           |                | NS           |                           | NS           |                | NS           | FR                         | 0.8          | FR             | 1.7          |
| Carfizomib                      | FR                            | 296          |                | NS           | FR                        | 2663.1       | FR             | 1908.1       | FR                         | 0.8          | FR             | 1.1          |
| Phenylarsine oxide              |                               | NS           | IR             | 45.4         |                           | NS           | IR             | 22.8         | FR                         | 1.5          | FR             | 1.2          |
| Proscillaridin                  | IR                            | 25.3         |                | NS           | FR                        | 190          |                | NS           | FR                         | 1.6          | FR             | 2.8          |
| Chlorambucil                    |                               | NS           |                | NS           |                           | NS           |                | NS           | FR                         | 1            | FR             | 0.9          |
| Cadmium acetate dihydrate       | IR                            | 46.7         | IR             | 51.7         | FR                        | 165.6        |                | NS           | FR                         | 0.5          | FR             | 0.5          |
| Cadmium reference solution      | IR                            | 0.9          | IR             | 1.3          | IR                        | 16           | IR             | 23.7         | FR                         | 0.8          | FR             | 0.7          |
| Dichlone                        |                               | NS           |                | NS           |                           | NS           |                | NS           | FR                         | 1            | FR             | 1.1          |

|                         |    |       |    |      |    |      |    |      |    |     |    |     |
|-------------------------|----|-------|----|------|----|------|----|------|----|-----|----|-----|
| Menadiol                |    | NS    |    | NS   |    | NS   | IR | 57.2 | FR | 1.1 | FR | 0.9 |
| Potassium dicyanoaurate | IR | 30.9  |    | NS   | IR | 57   | IR | 14.4 | FR | 0.7 | FR | 1.7 |
| Cadmium dinitrate       | FR | 168.1 | FR | 233  | FR | 270  | FR | 283  | FR | 0.5 | FR | 0.6 |
| Dibutyltin dichloride   | IR | 37.5  | IR | 20.2 | IR | 16.7 | IR | 3.84 | FR | 0.9 | FR | 1   |
| Triphenyltin hydroxide  | IR | 30    | IR | 55.8 | IR | 1.8  | IR | 0.5  | FR | 1.1 | FR | 1.5 |
| Ziram                   | IR | 48.3  | FR | 189  | IR | 45.1 | IR | 25.1 | FR | 0.4 | FR | 0.9 |

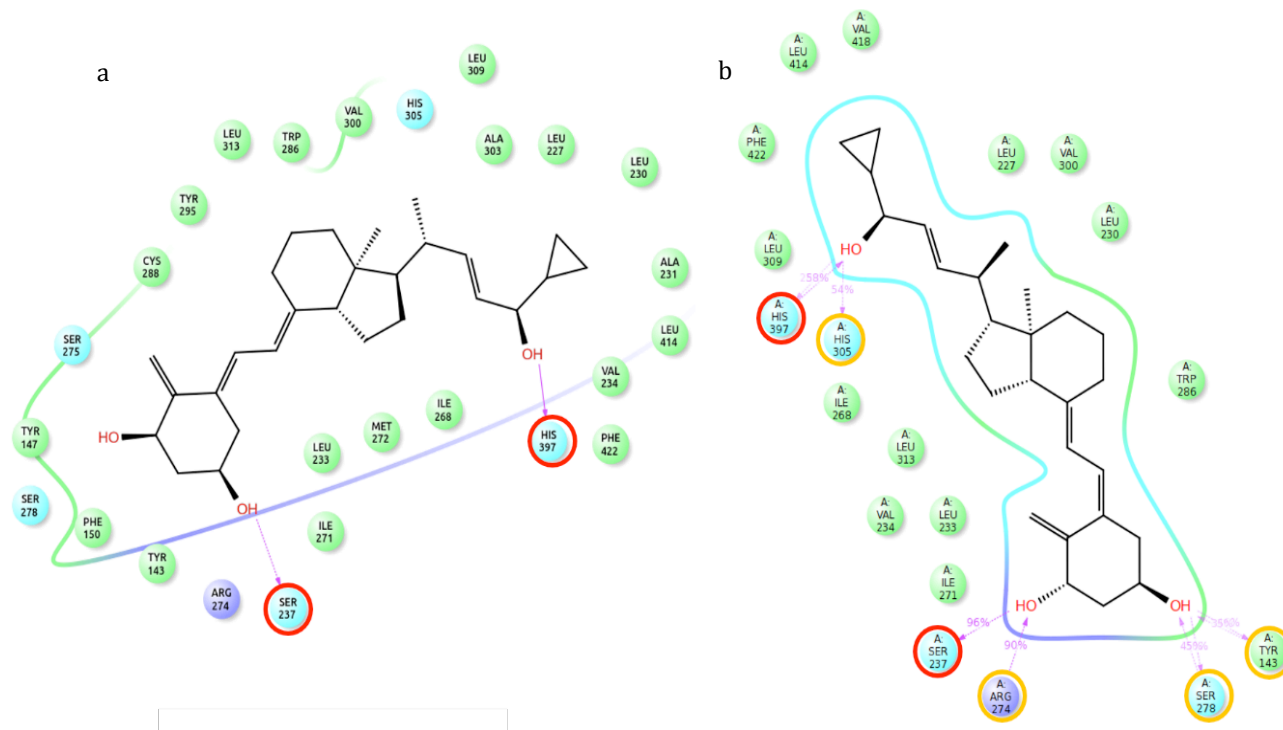

**Supplementary Figure S1.** a. 2D predicted binding mode of calcipotriol using molecular docking, b. 2D predicted binding mode of calcipotriol using molecular dynamic simulations. Highlighted in red the interaction in common between the molecular docking and the molecular dynamic procedures, highlighted in orange the interaction only detected during the molecular dynamic procedure.

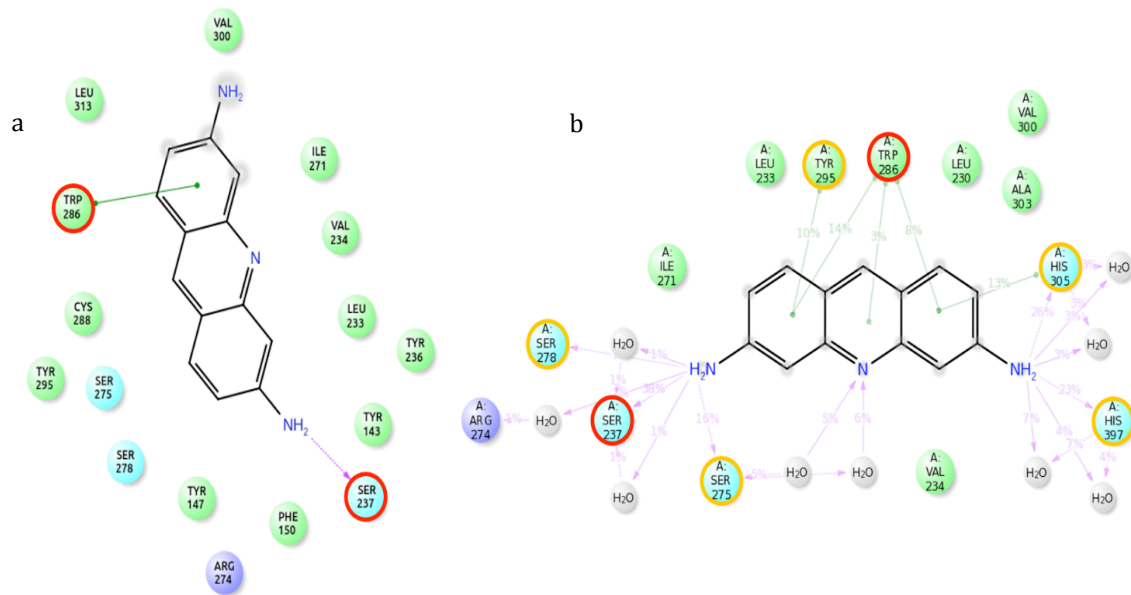

**Supplementary Figure S2.** a. A 2D predicted binding mode of proflavine hydrochloride using molecular docking, b. A 2D predicted binding mode of proflavine hydrochloride using molecular dynamic simulations. Highlighted in red the interaction in common between the molecular docking and the molecular dynamic procedures, highlighted in orange the interaction only detected during the molecular dynamic procedure.

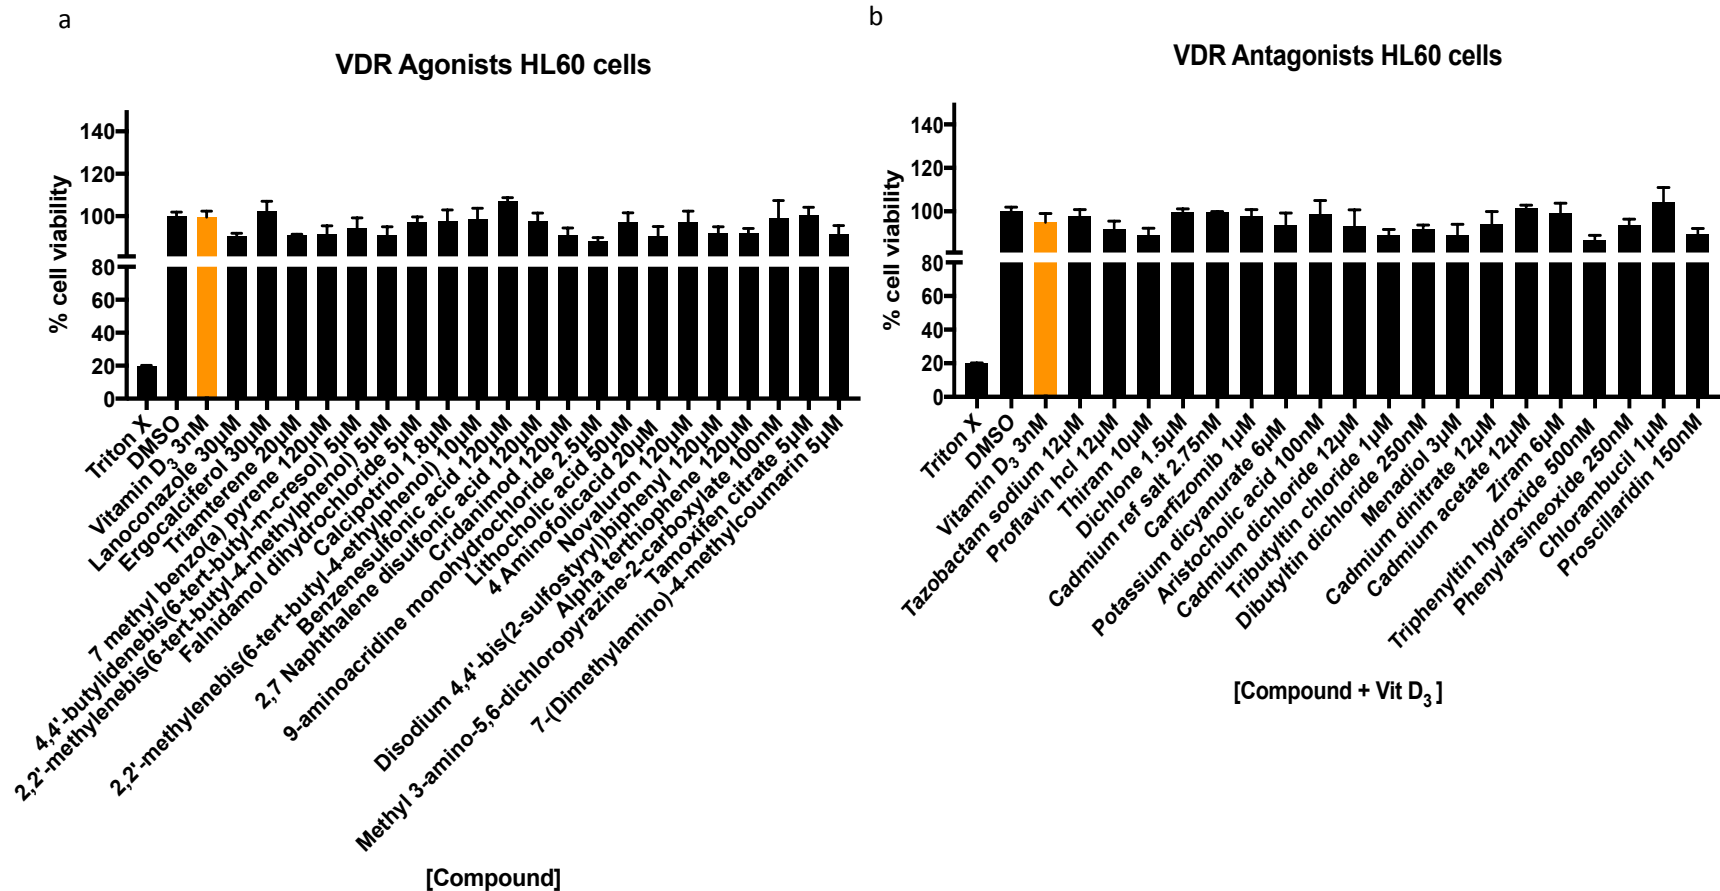

**Supplementary Figure S3.** Figure showing the results of cell viability assay in HL-60 cells for a. VDR agonists and b. VDR antagonists. The concentrations of compounds corresponding to cell viability percentages of more than 80 were considered appropriate for testing in in-vitro assays. The viability percentage of treatments was measured against that of DMSO. Cells treated with 0.1% Triton X acted as a negative control while those treated with Vitamin D<sub>3</sub> acted as a positive control. Data were measured as SEM (n=3) and plotted with GraphPad prism.

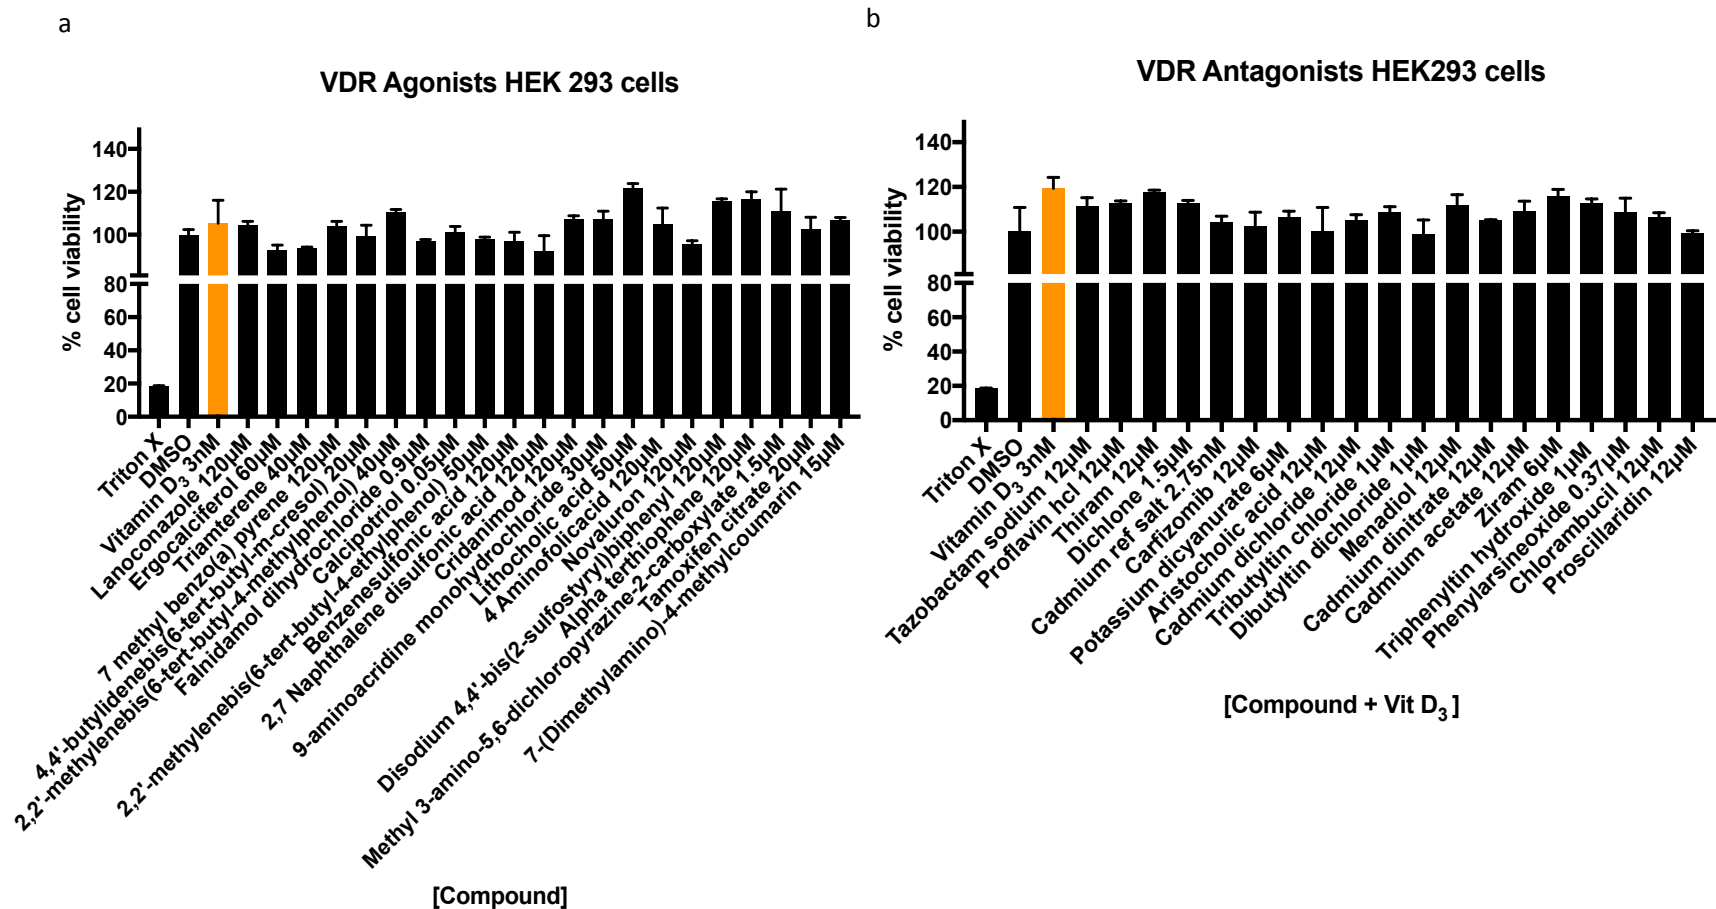

**Supplementary Figure S4.** Figure showing the results of cell viability assay in HEK293 cells for a. VDR agonists and b. VDR antagonists. The concentrations of compounds corresponding to cell viability percentages of more than 80 were considered appropriate for testing in in-vitro assays. The viability percentage of treatments was measured against that of DMSO. Cells treated with 0.1% Triton X acted as a negative control while those treated with Vitamin D<sub>3</sub> acted as a positive control. Data were measured as SEM (n=3) and plotted with GraphPad prism.



a

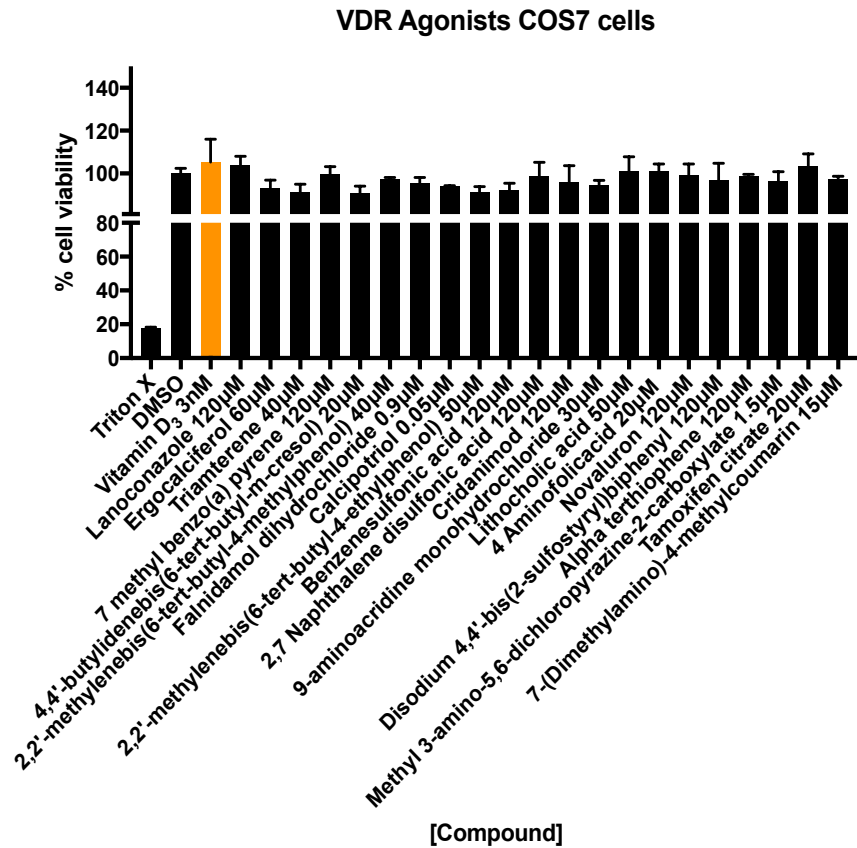

b

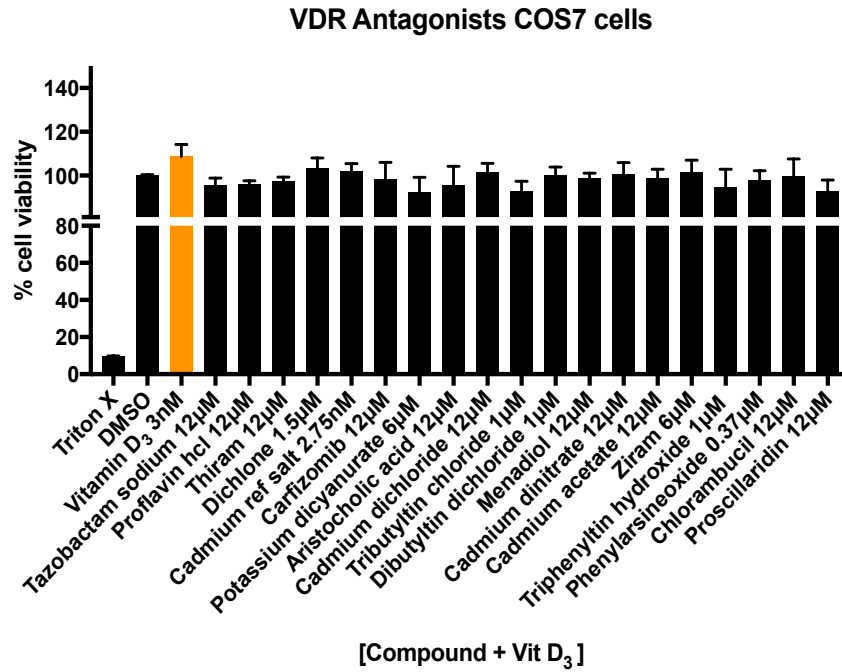

**Supplementary Figure S5.** Figure showing the results of cell viability assay in Cos7 cells for a. VDR agonists and b. VDR antagonists. The concentrations of compounds corresponding to cell viability percentages of more than 80 were considered appropriate for testing in in-vitro assays. The viability percentage of treatments was measured against that of DMSO. Cells treated with 0.1% Triton X acted as a negative control while those treated with Vitamin D<sub>3</sub> acted as a positive control. Data were measured as SEM (n=3) and plotted with GraphPad prism.

### VDR agonists

a

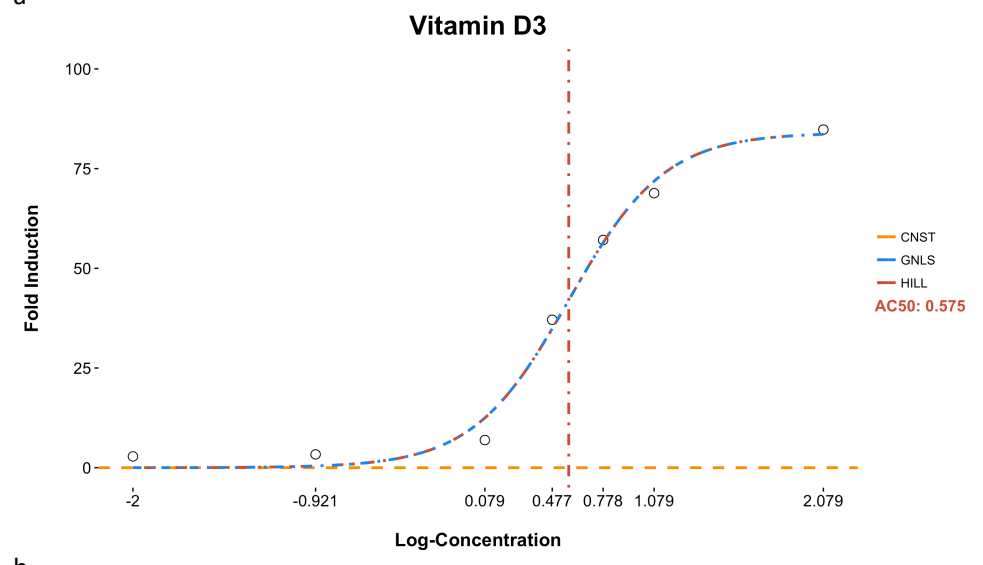

b

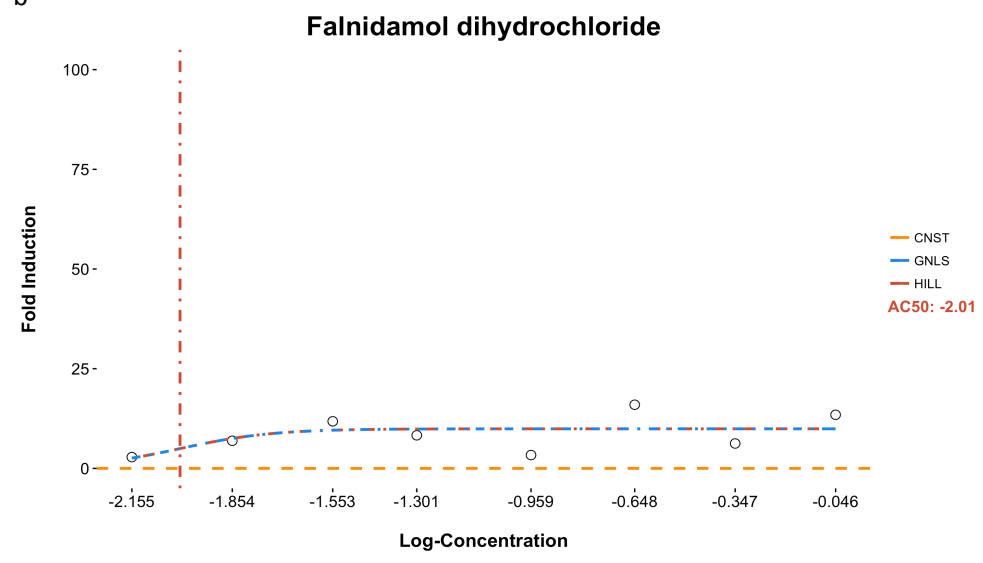

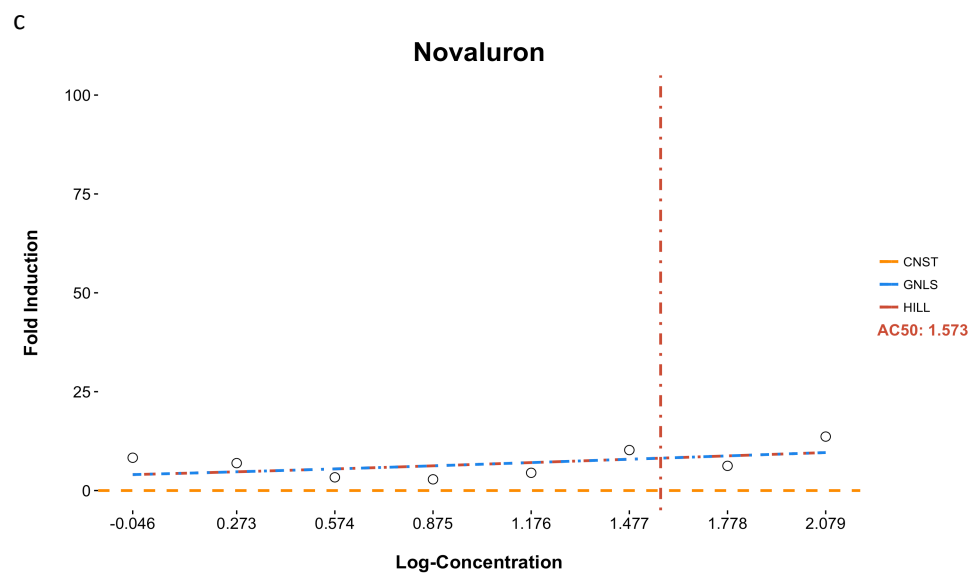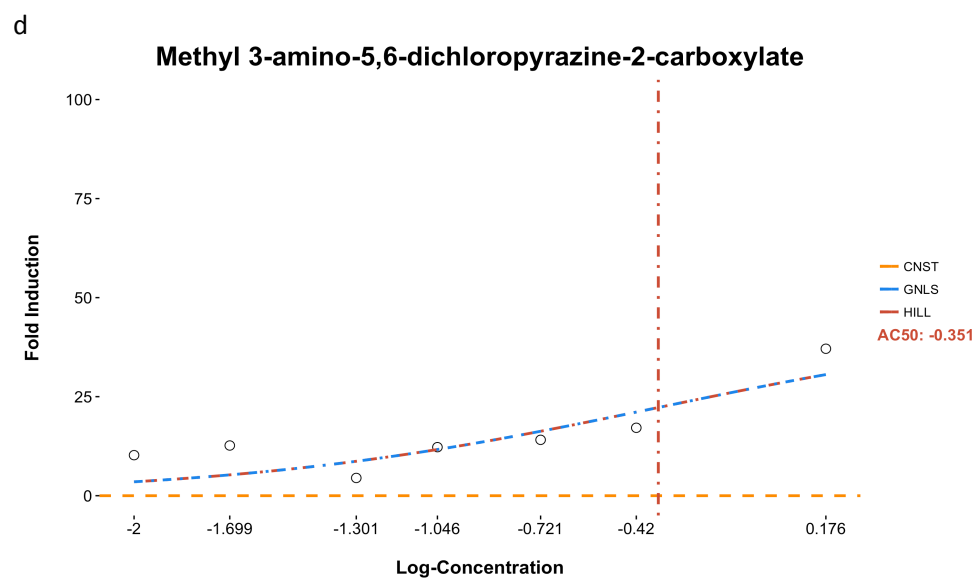

e

### Triamterene

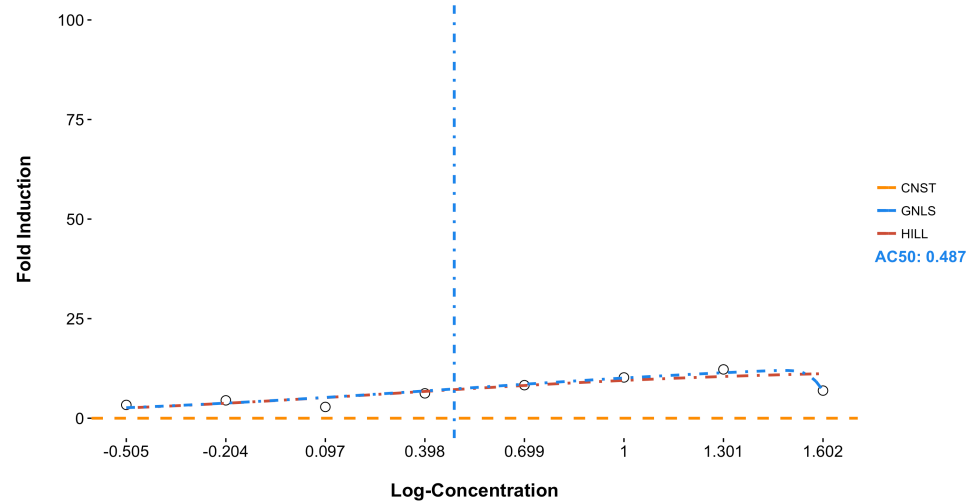

f

### Ergocalciferol

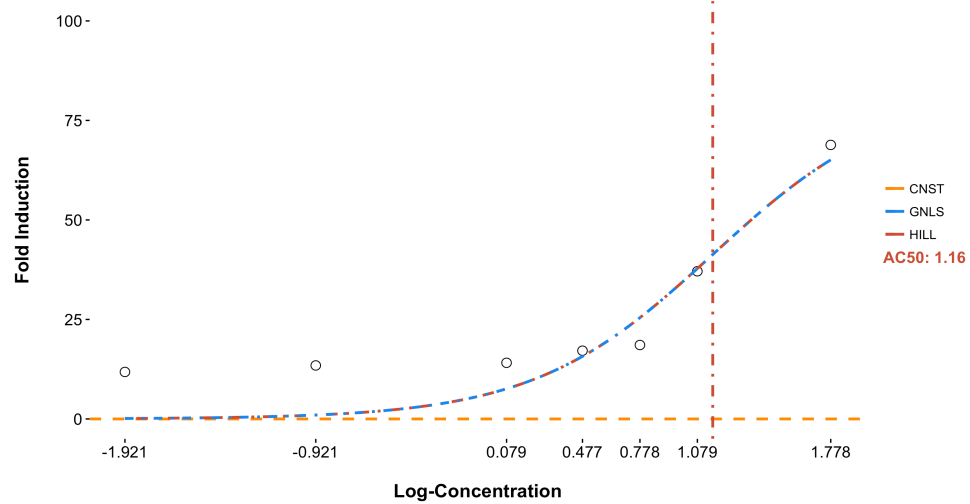

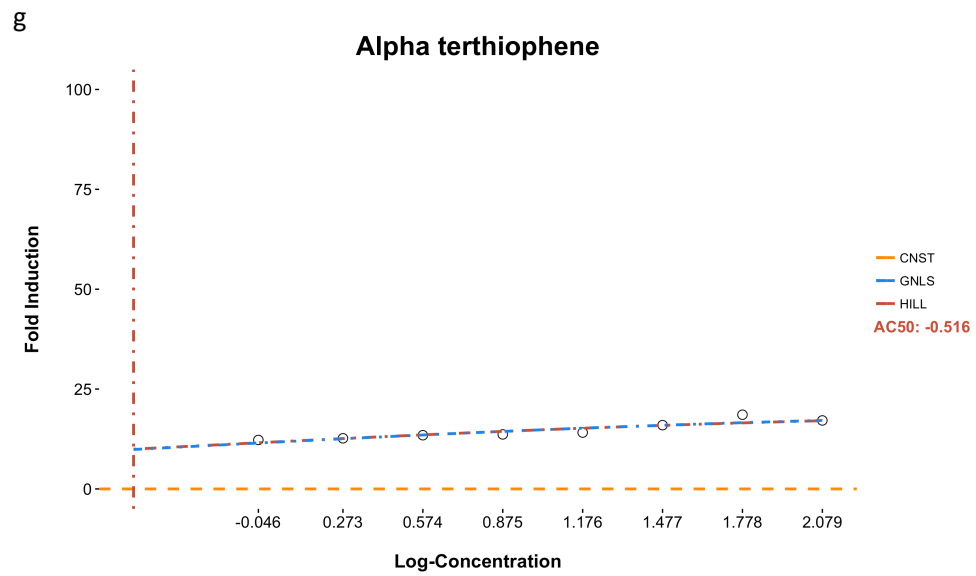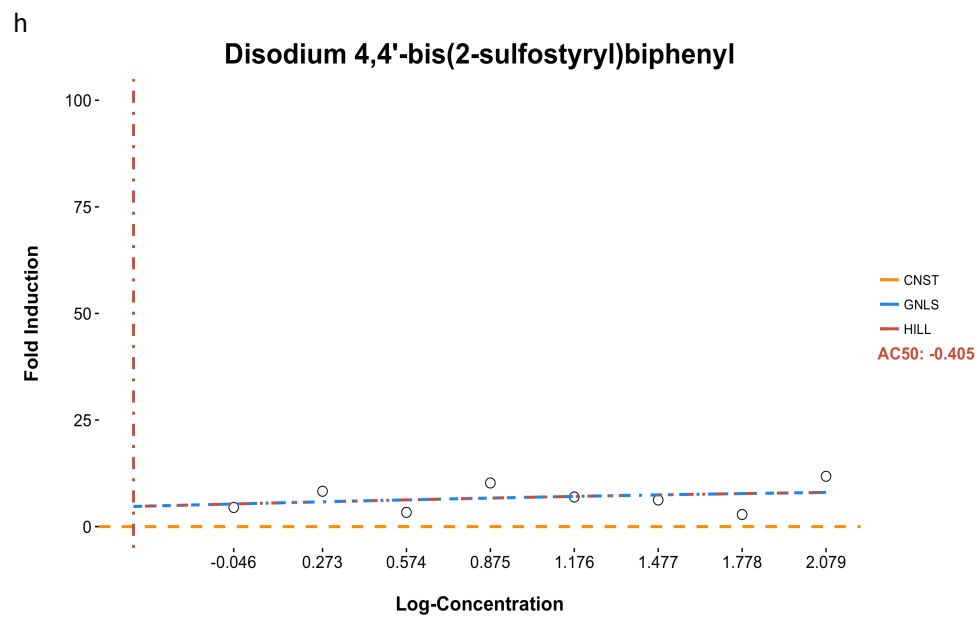

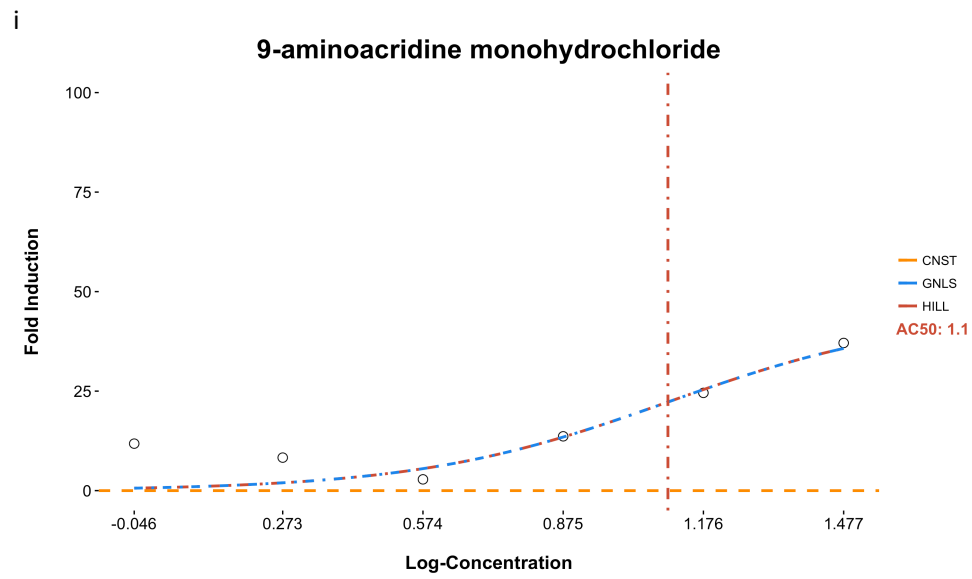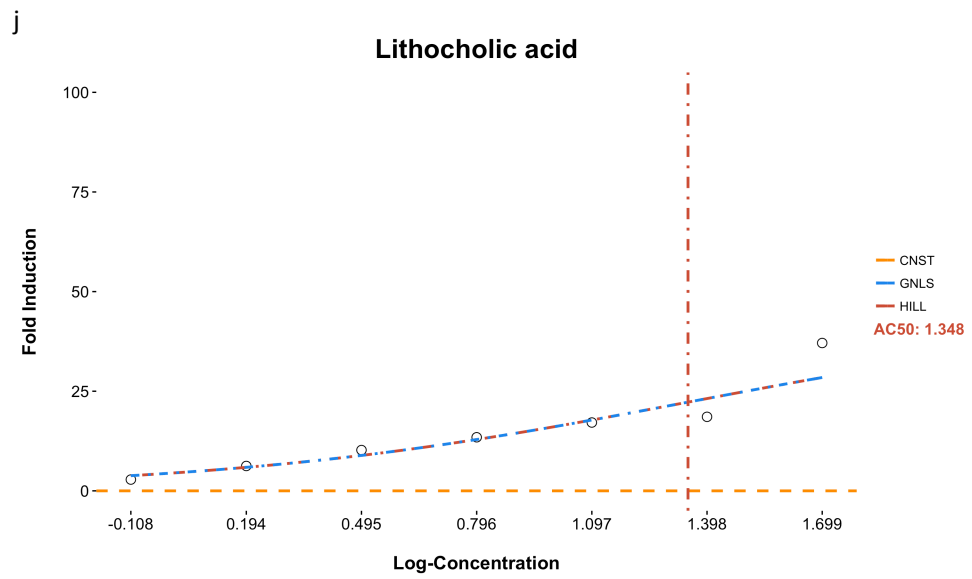

k

### 7 methyl benzo(a) pyrene

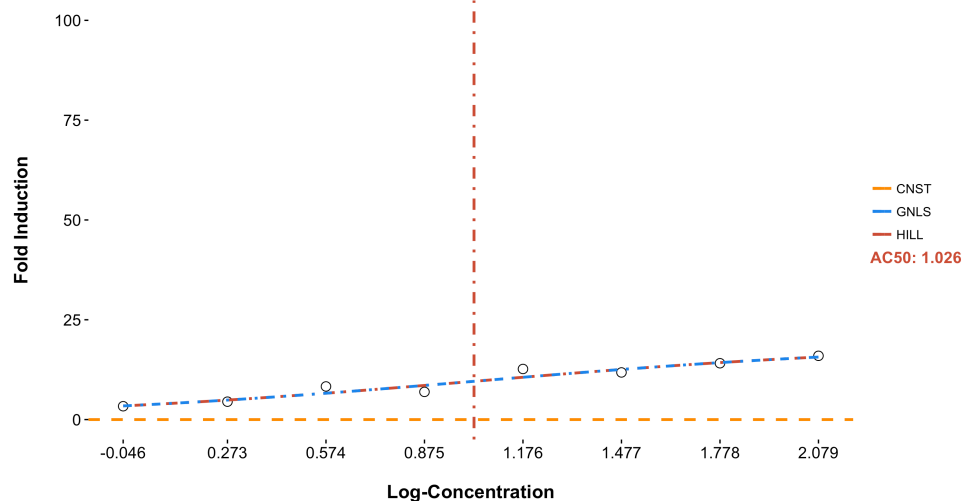

l

### 4 Amino folic acid

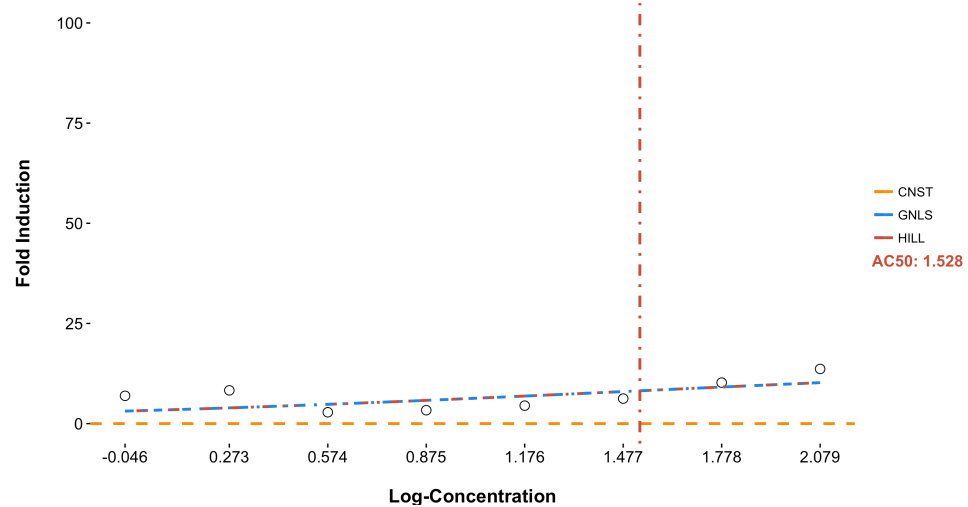

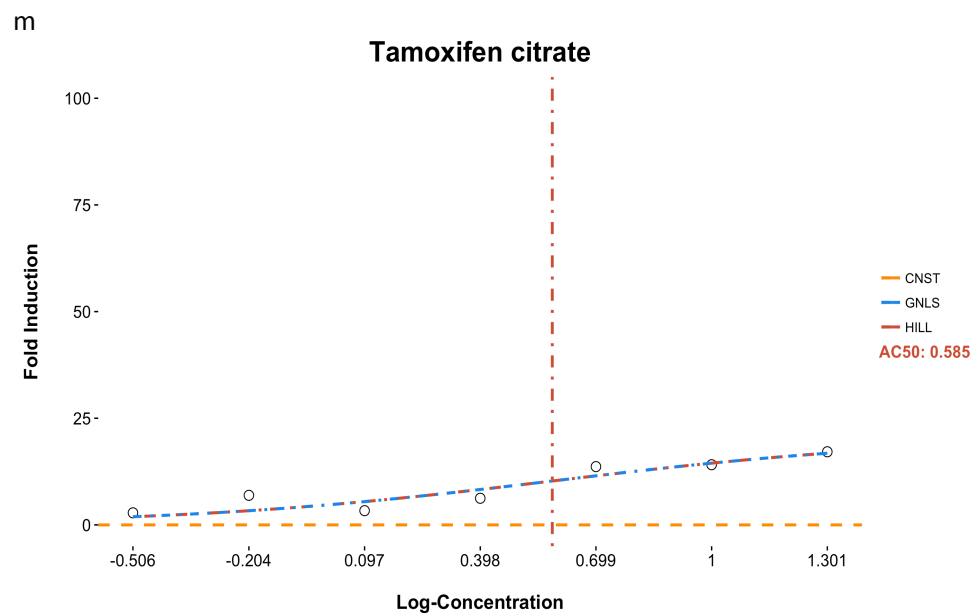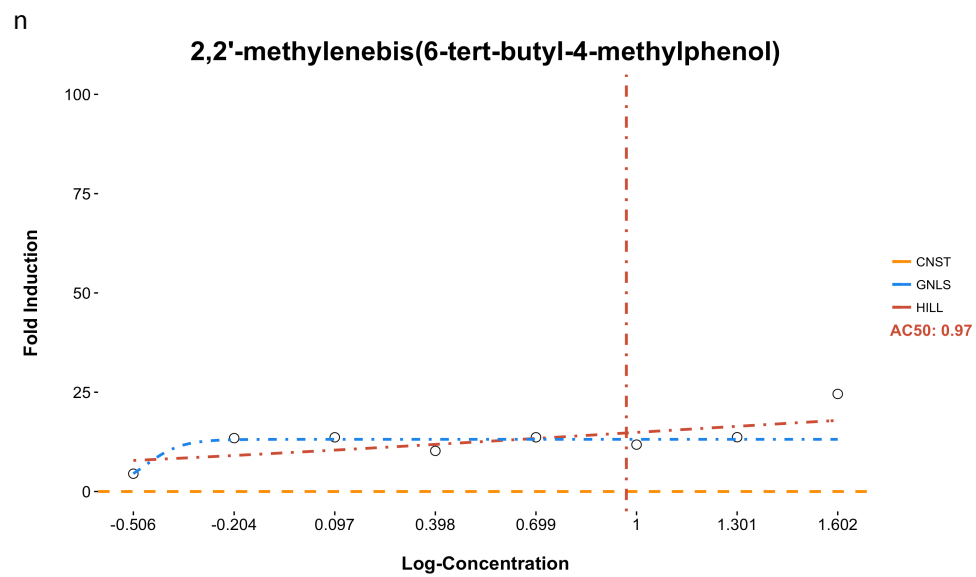



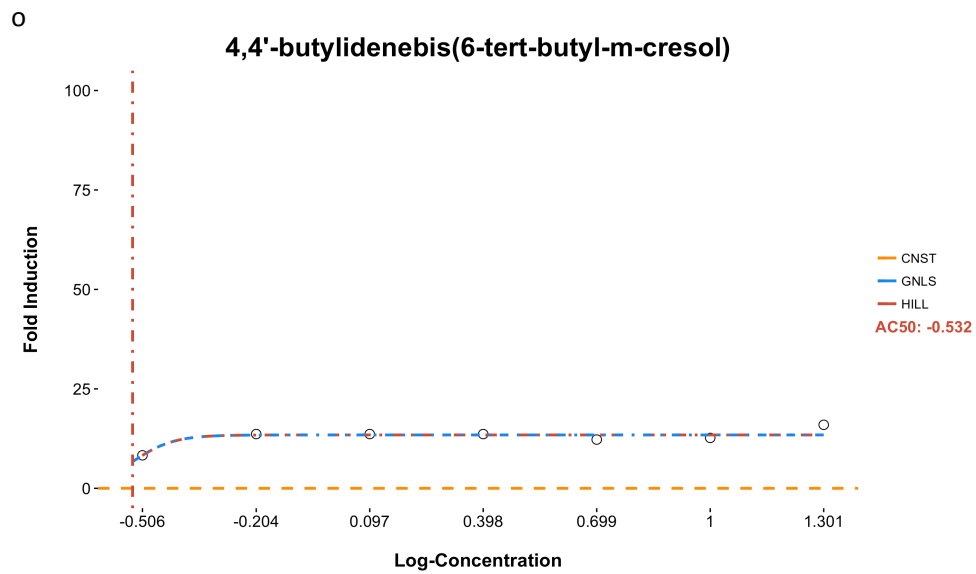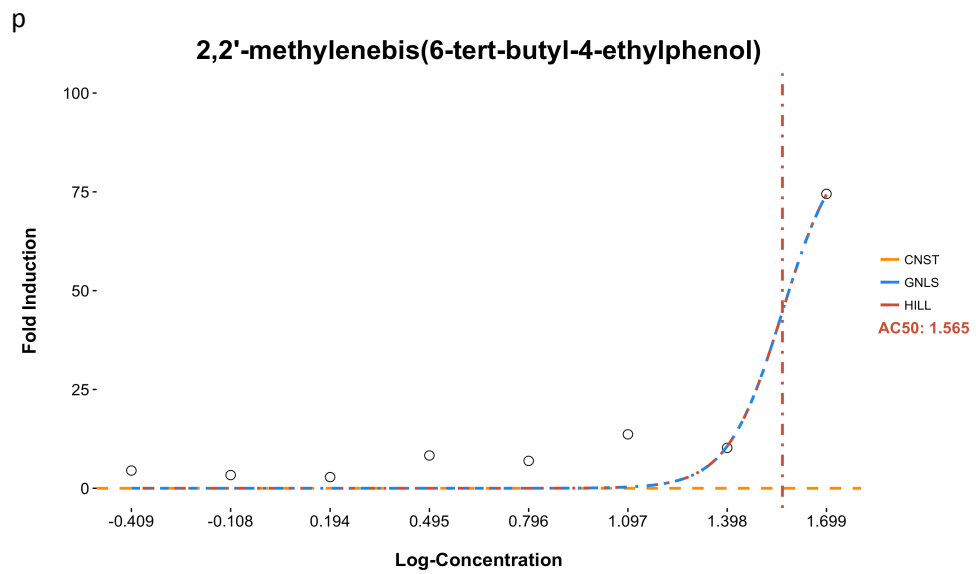

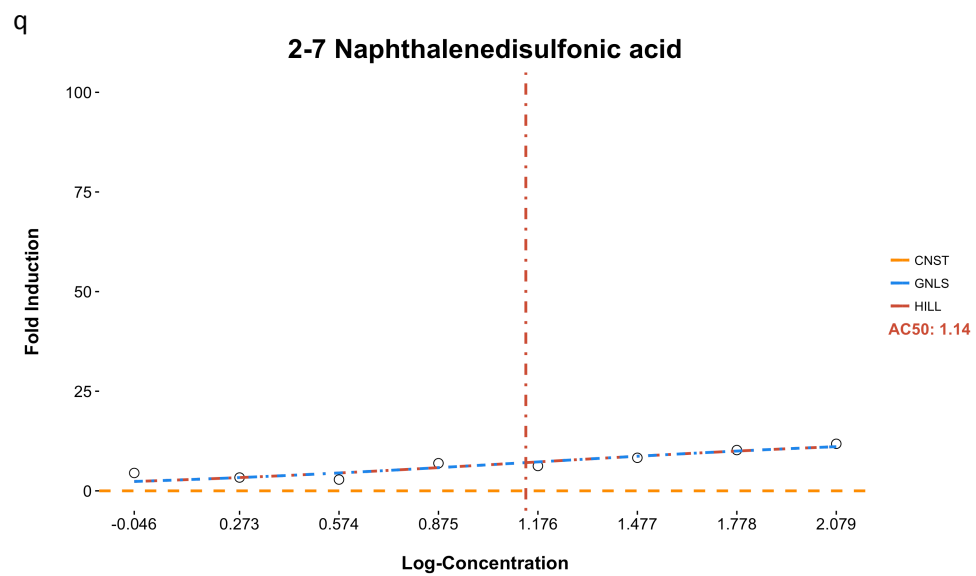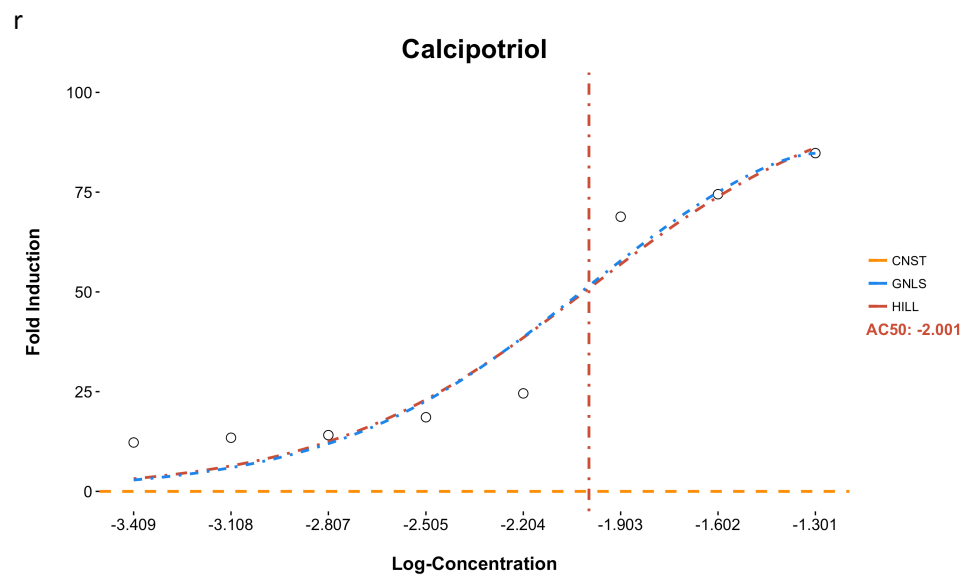

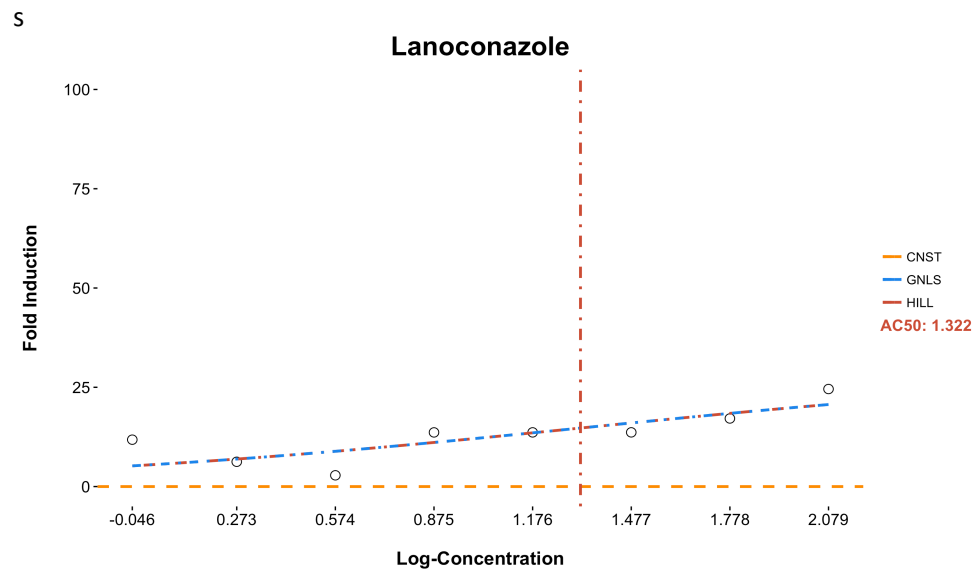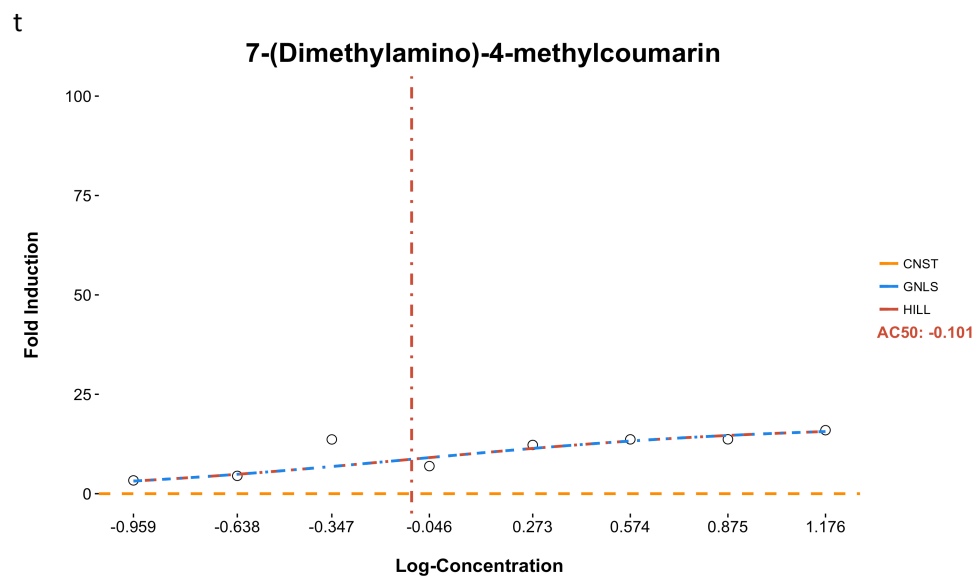

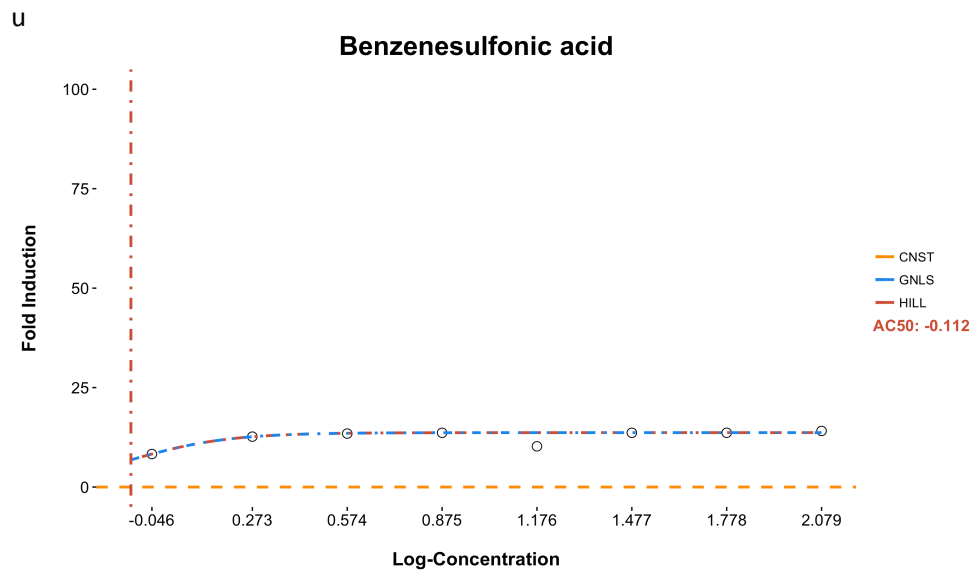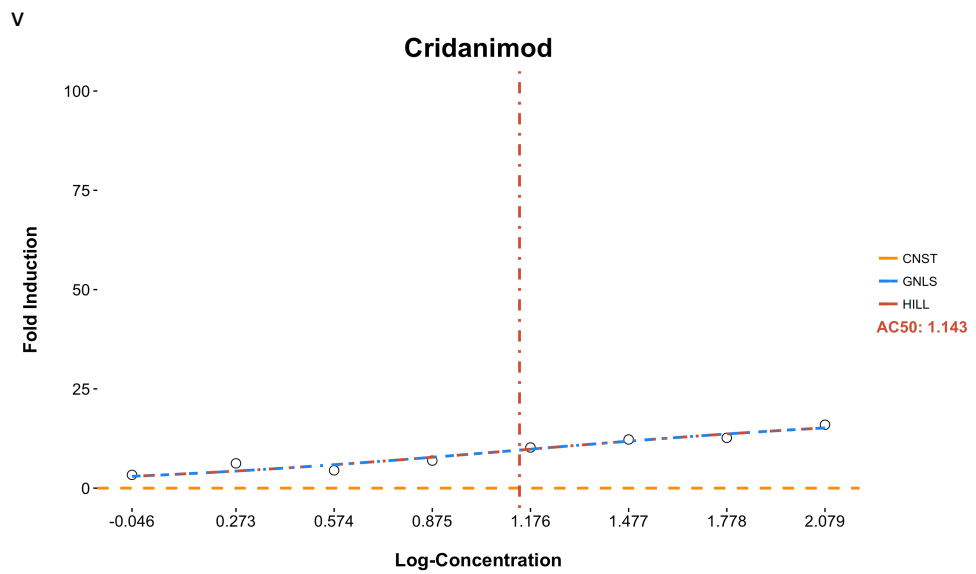

**Supplementary Figure S6.** Shows transient transactivation dose response curves for all 21 agonists and vitamin D<sub>3</sub> (a-v). The normalization method used is quantile normalization, which uses rankings of the data and averages to adjust the data across distributions. IC50 values were derived from Hill and Gain-Loss models of dose-response curves generated using the TCPL R package

## VDR Antagonists

a

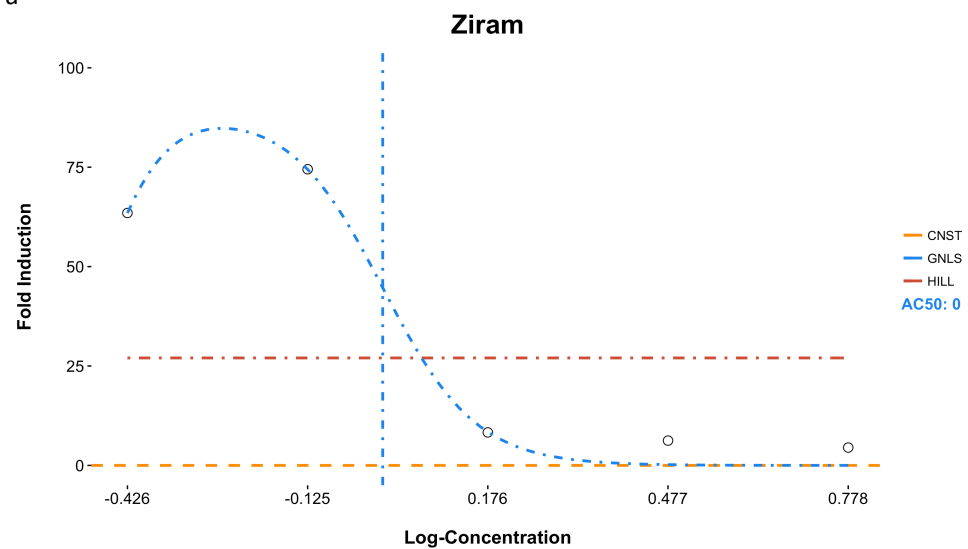

b

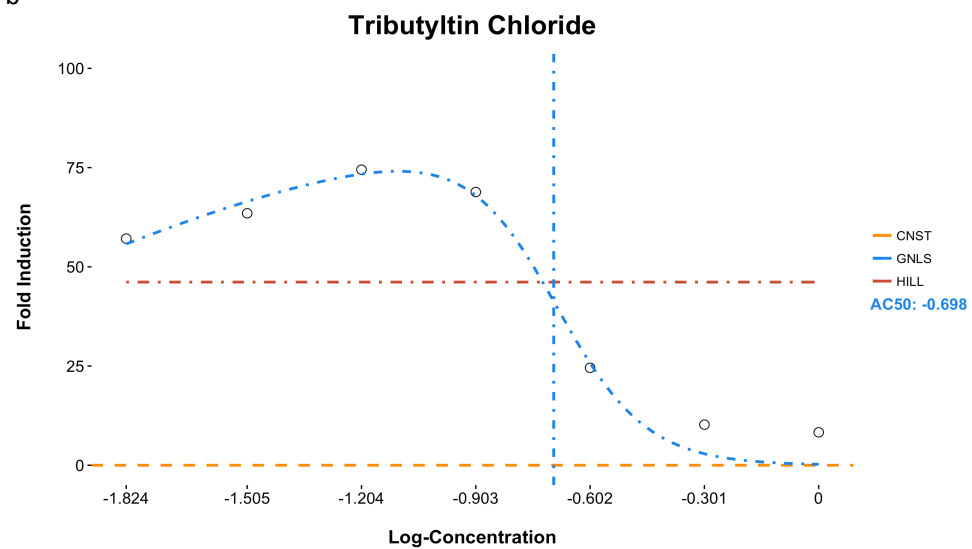

C

### Thiram

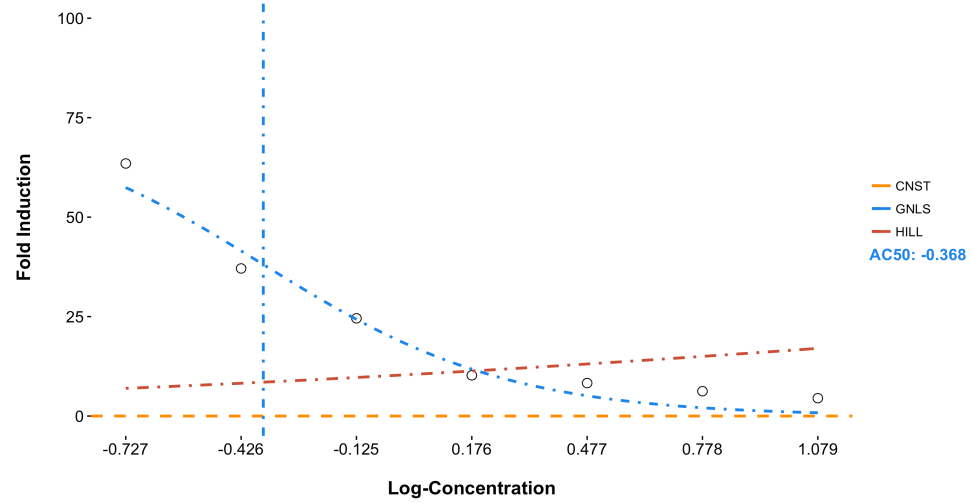

d

### Tazobactam sodium

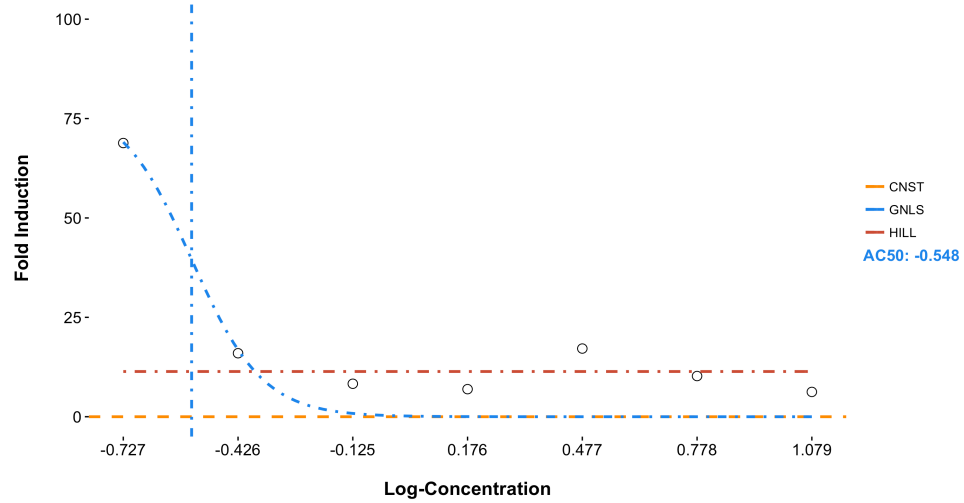

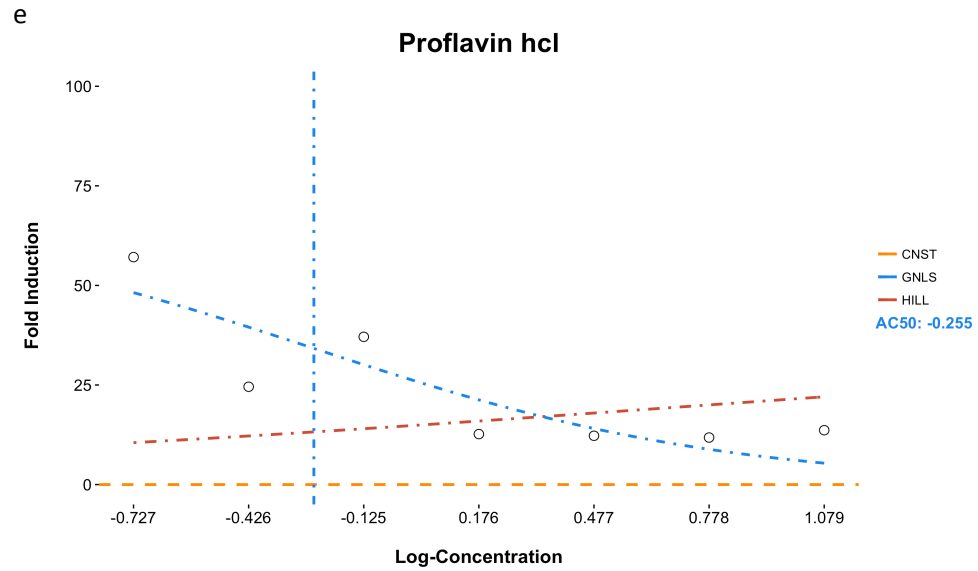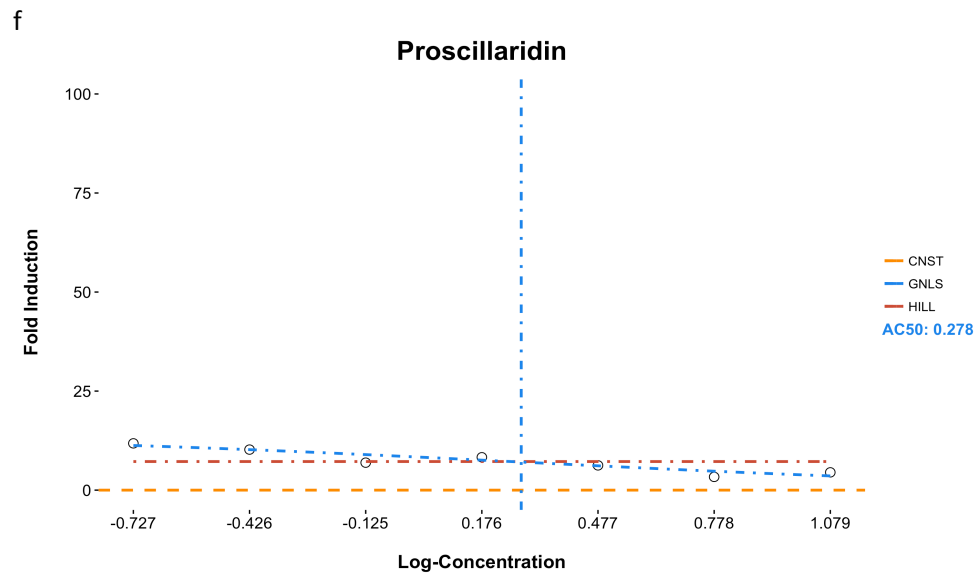



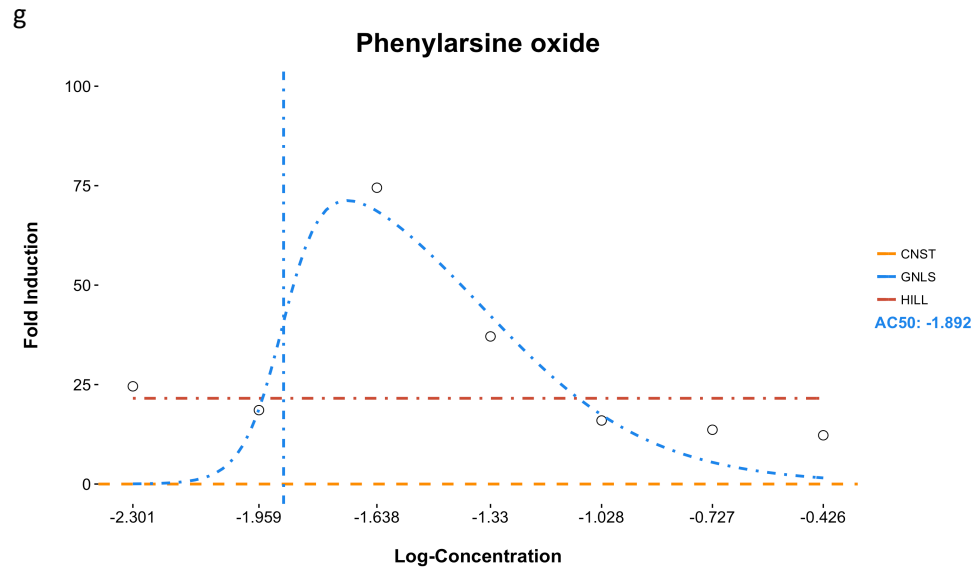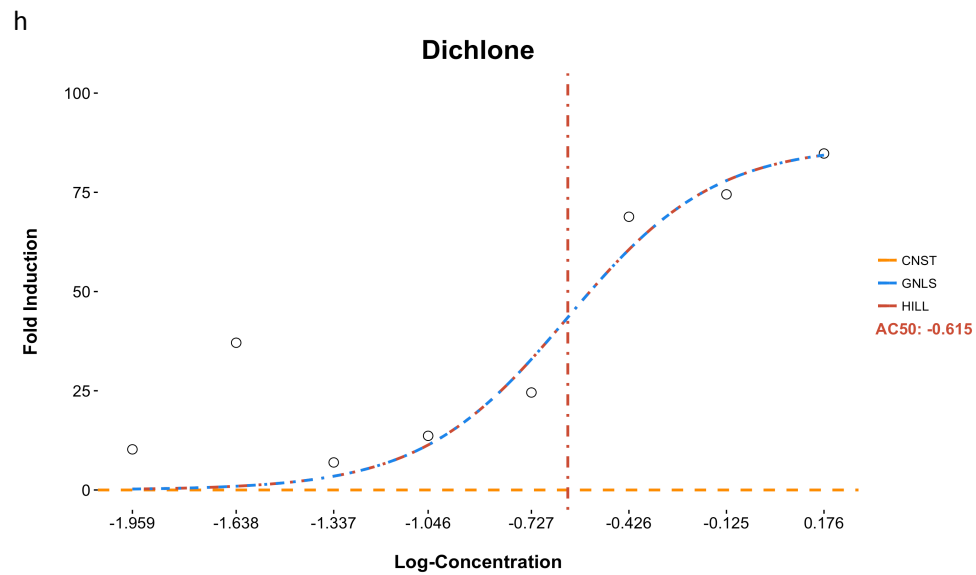

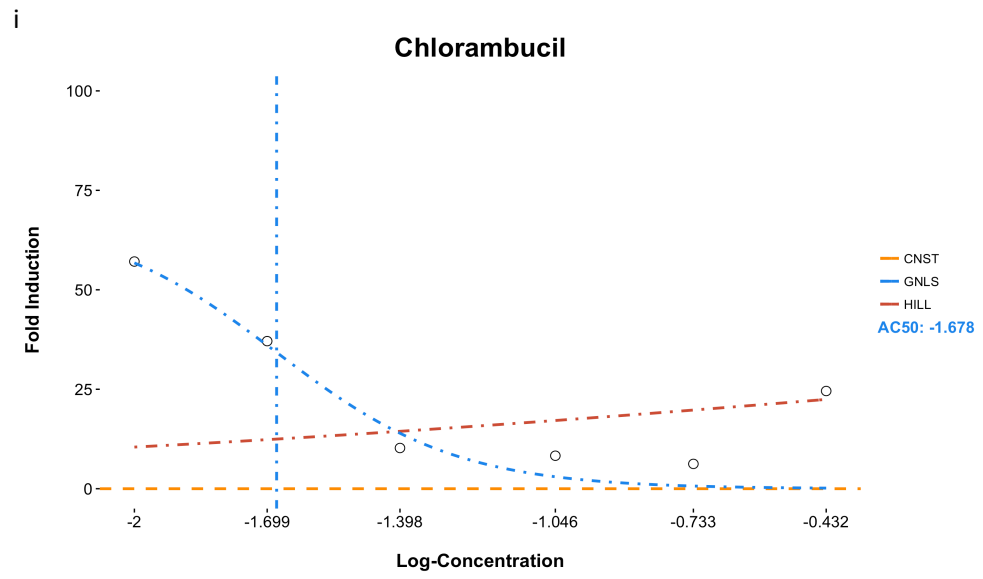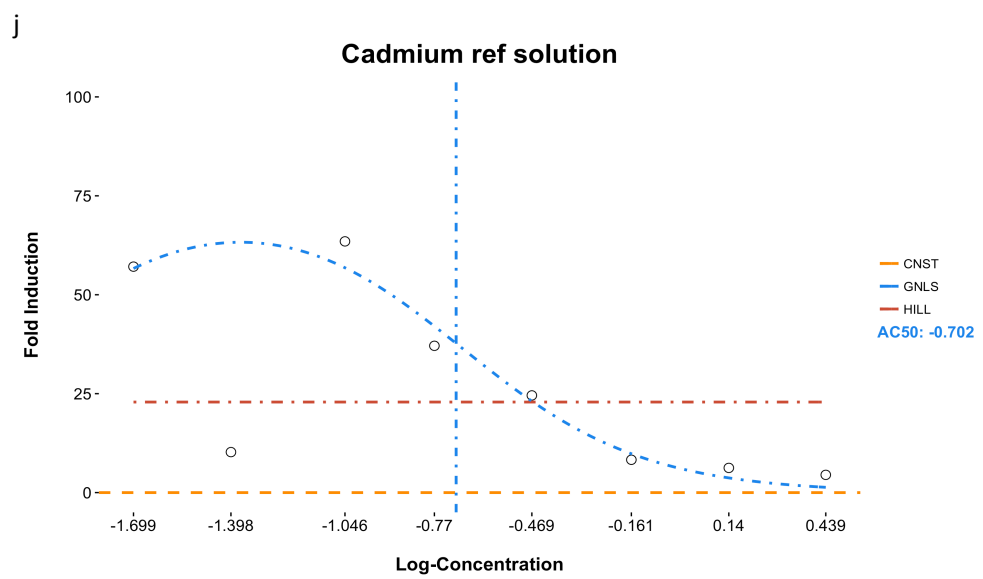

k

### Fluorescein Sodium

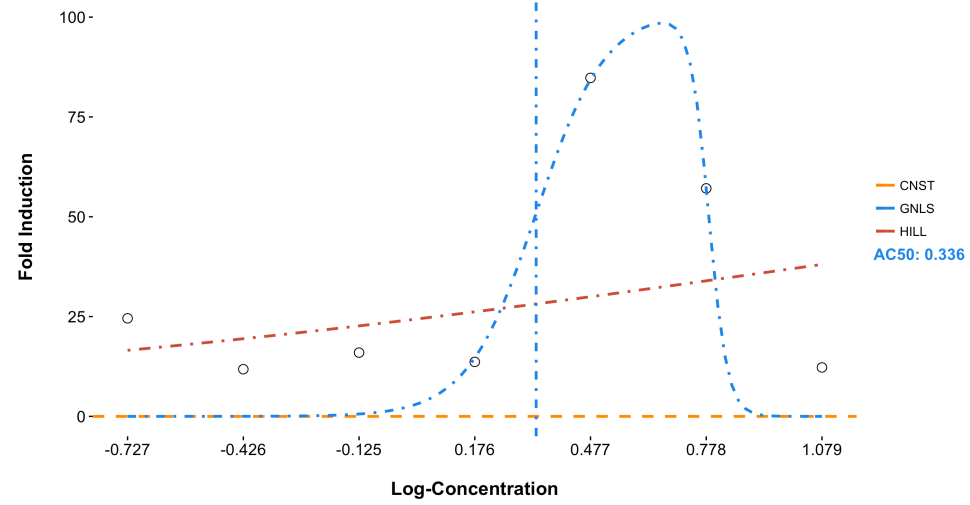

l

### Cadmium chloride

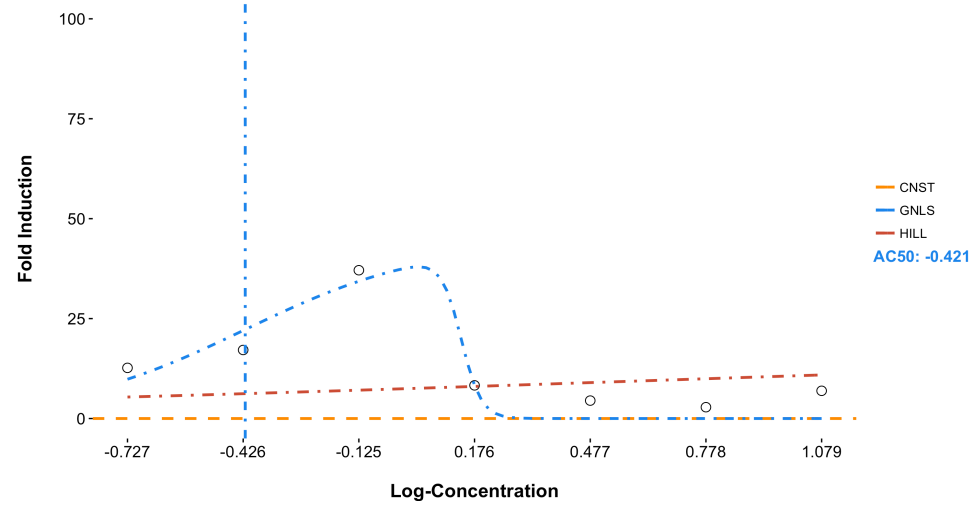

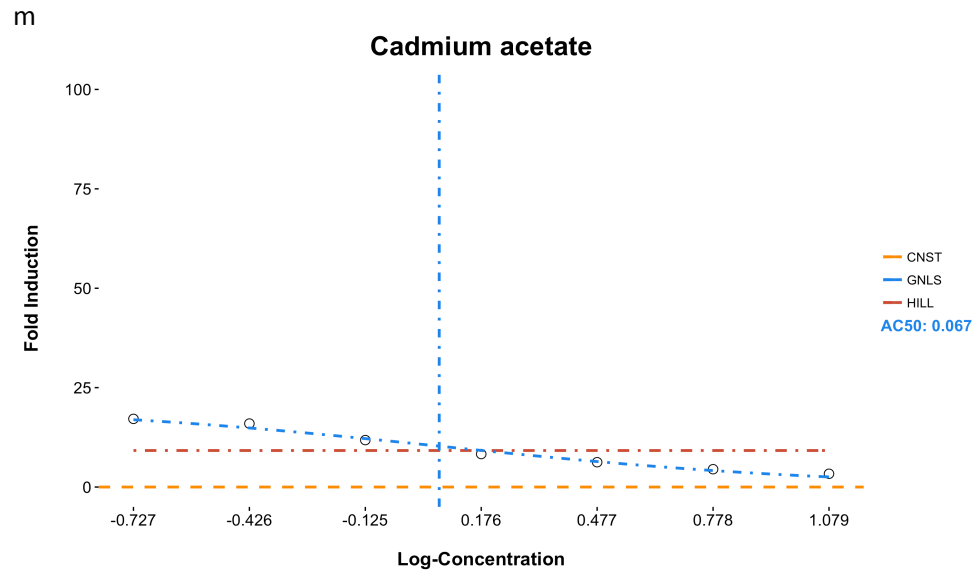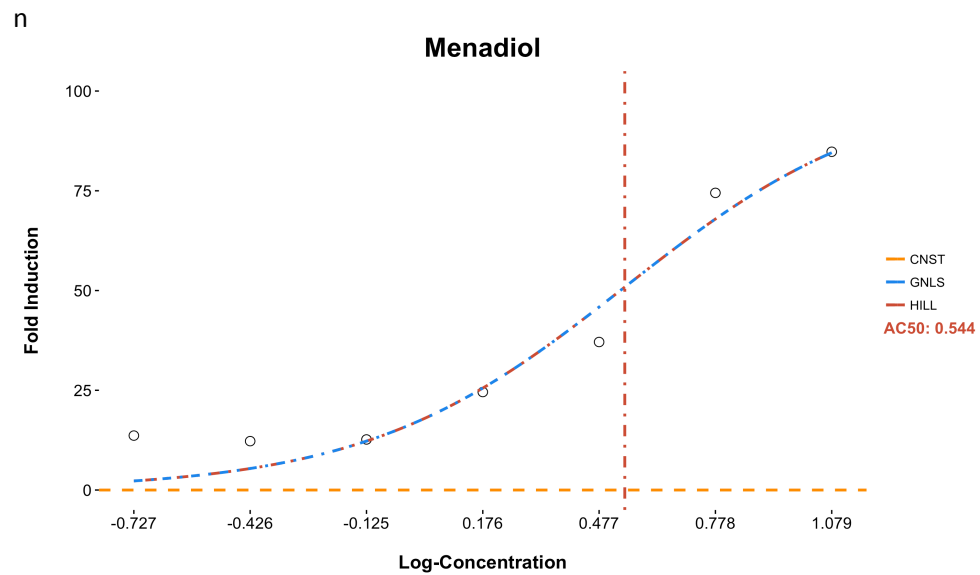

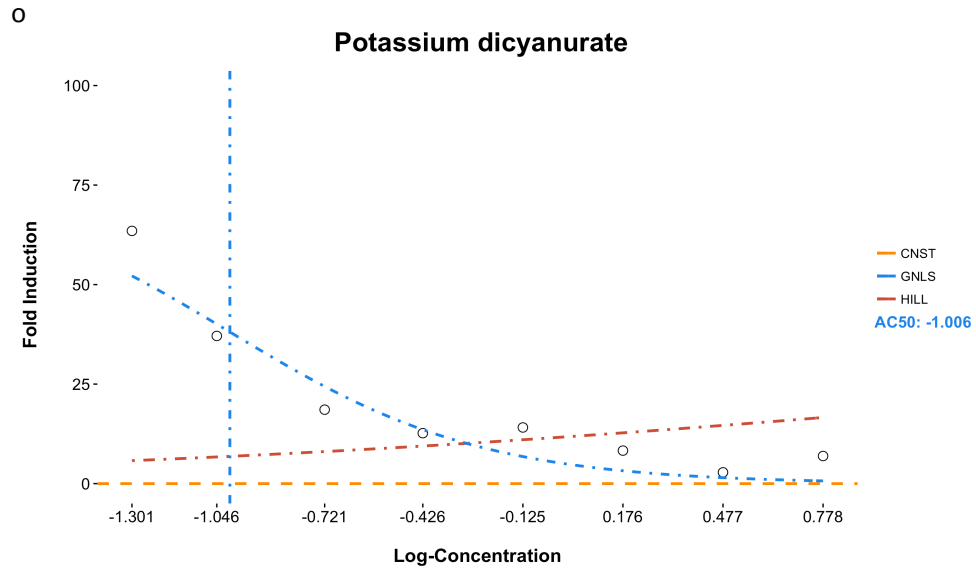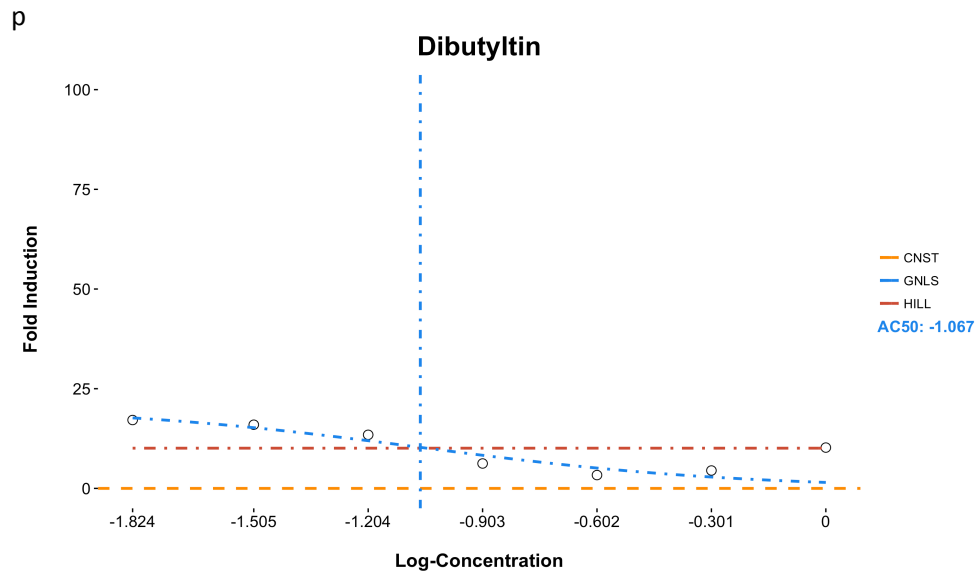

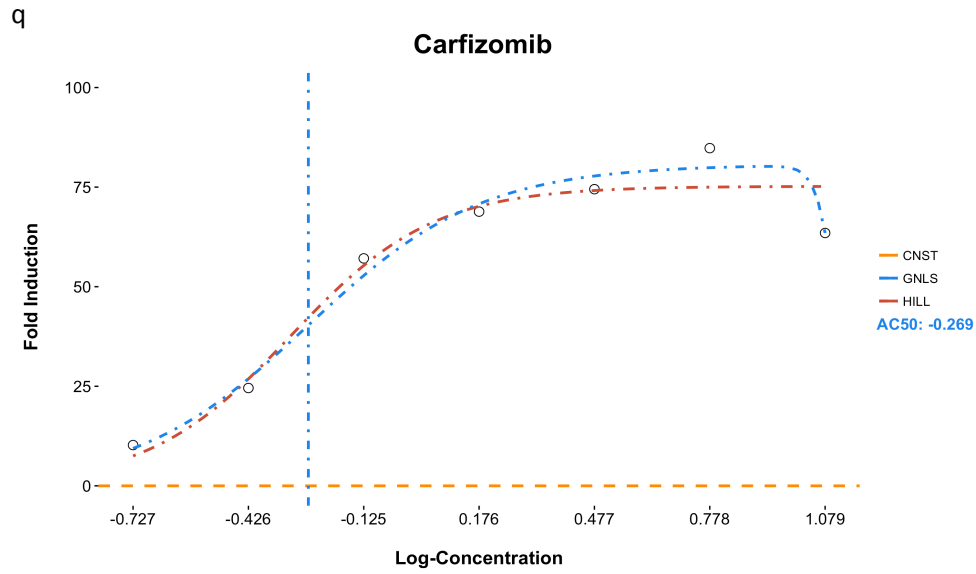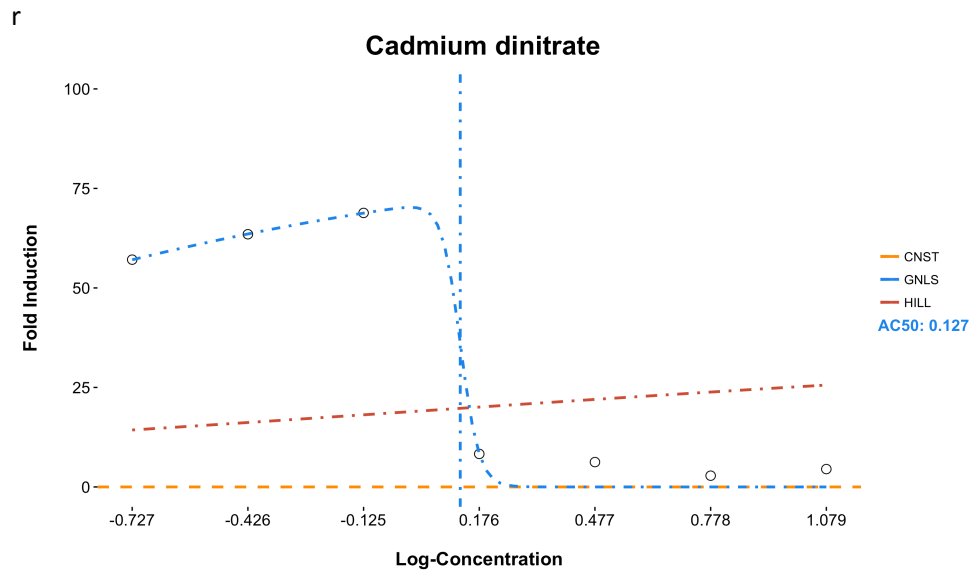

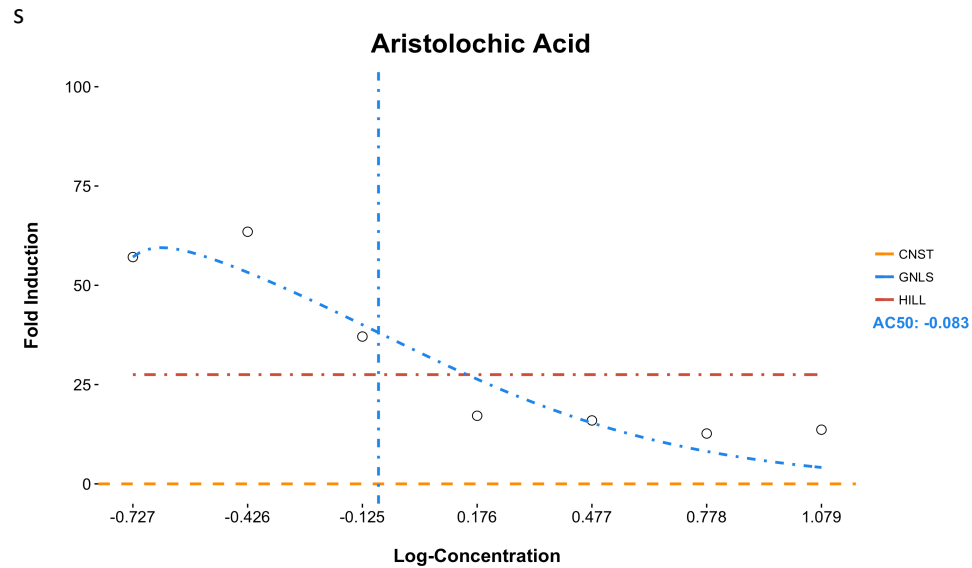

**Supplementary Figure S7.** Shows transient transactivation dose response curves for all 19 antagonists (a-s). The normalization method used is quantile normalization, which uses rankings of the data and averages to adjust the data across distributions. IC50 values were derived from Hill and Gain-Loss models of dose-response curves generated using the TCPL R package
